# Supplementary material for: Accuracy of minimal residual disease detection by circulating tumor DNA profiling in lung cancer: a meta-analysis
Source: PubMed Central journal article supplement (PMC10176776; doi:10.1186/s12916-023-02849-z), 2023-05-12

A

## Landmark

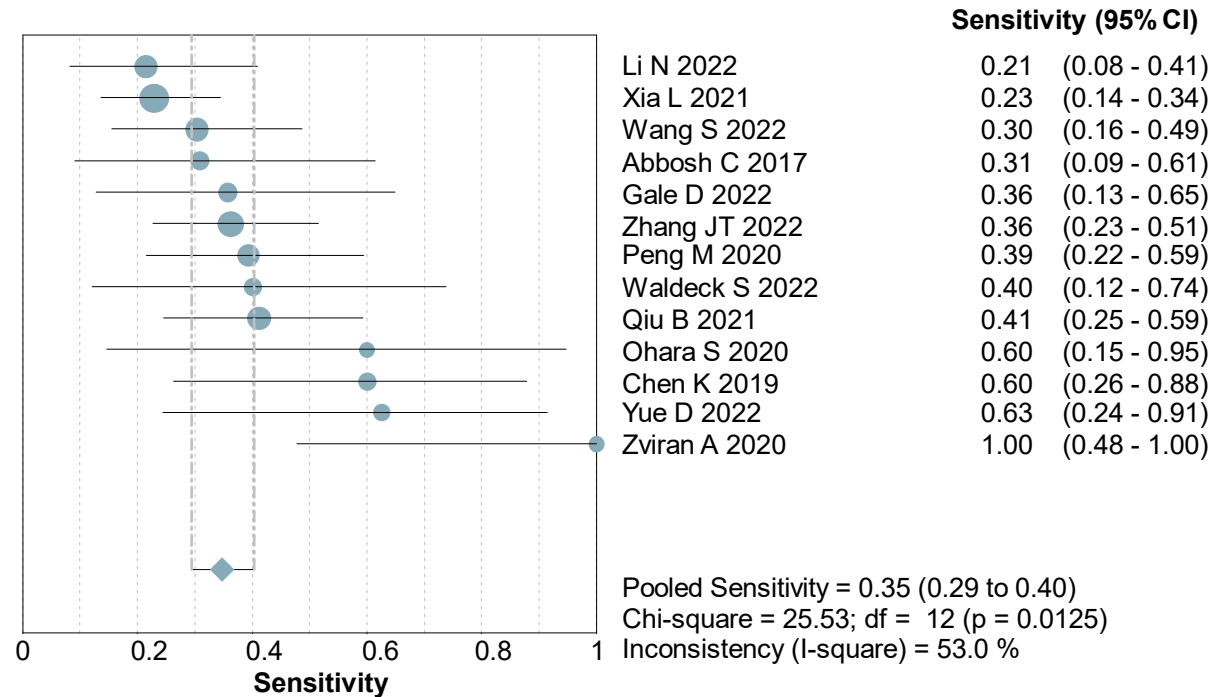

B

## Landmark

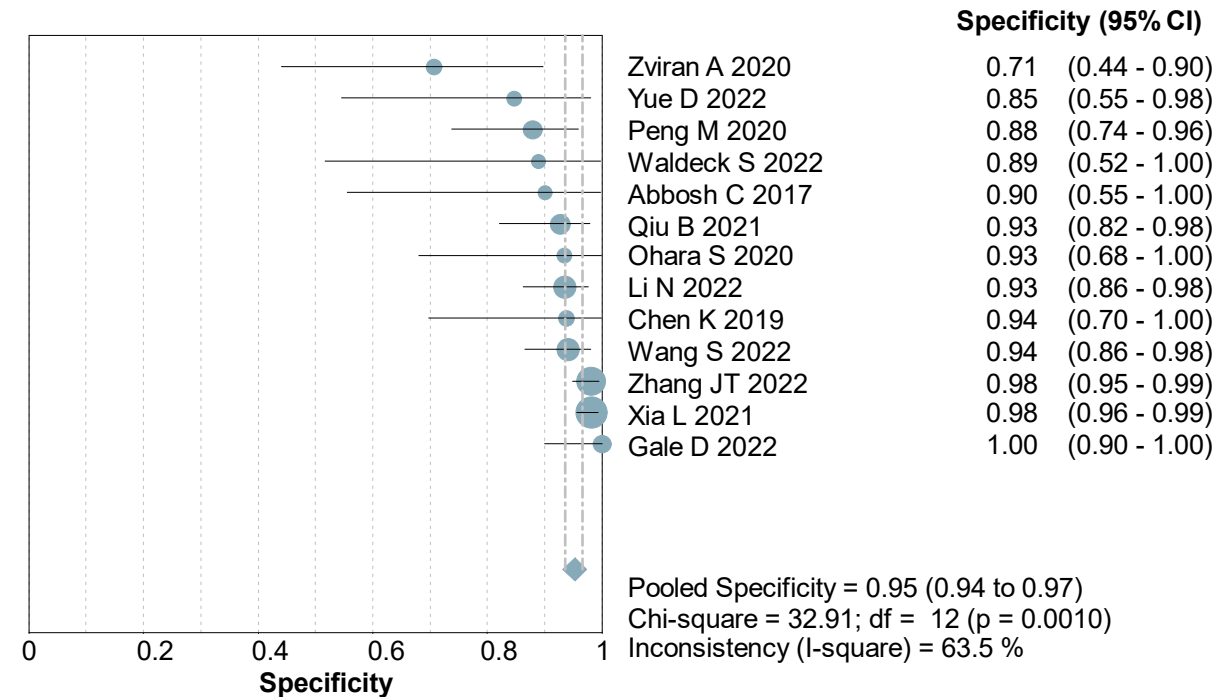

C

## Landmark

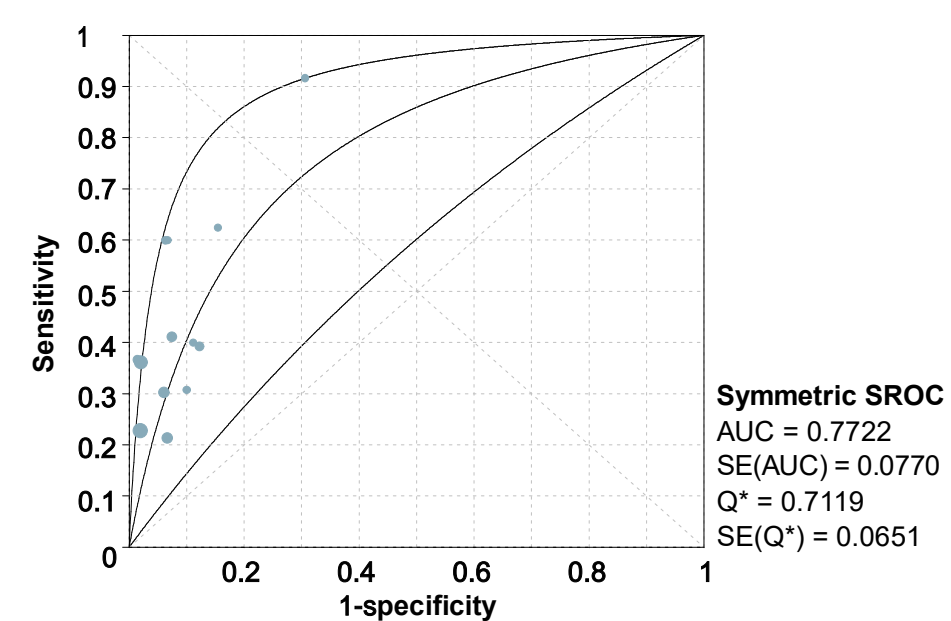

D

## Surveillance

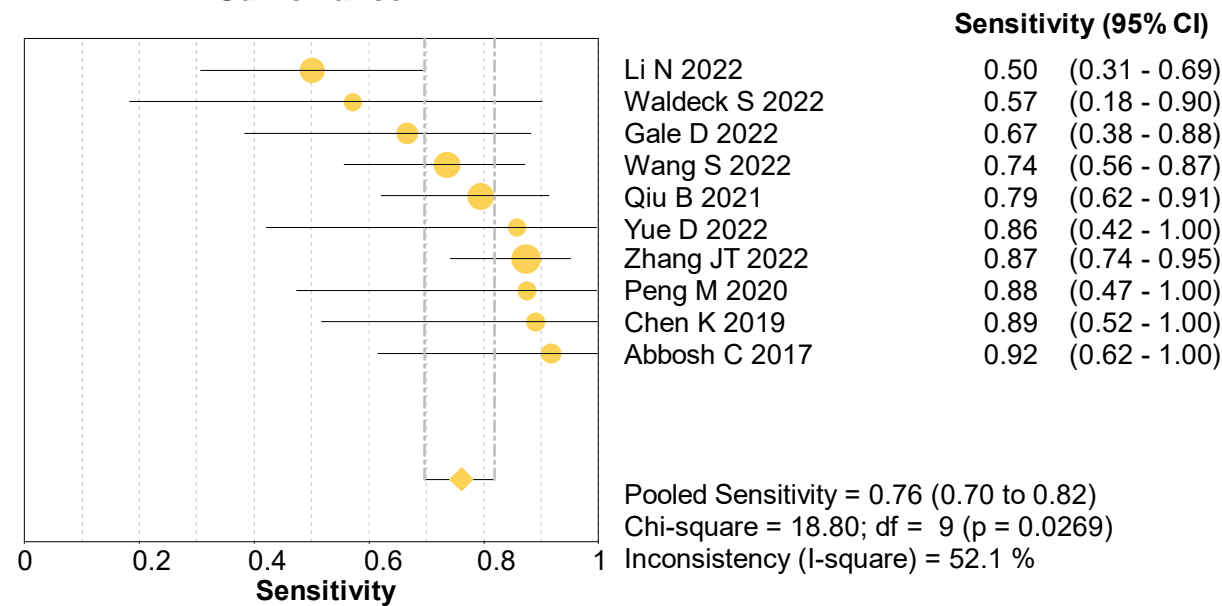

E

## Surveillance

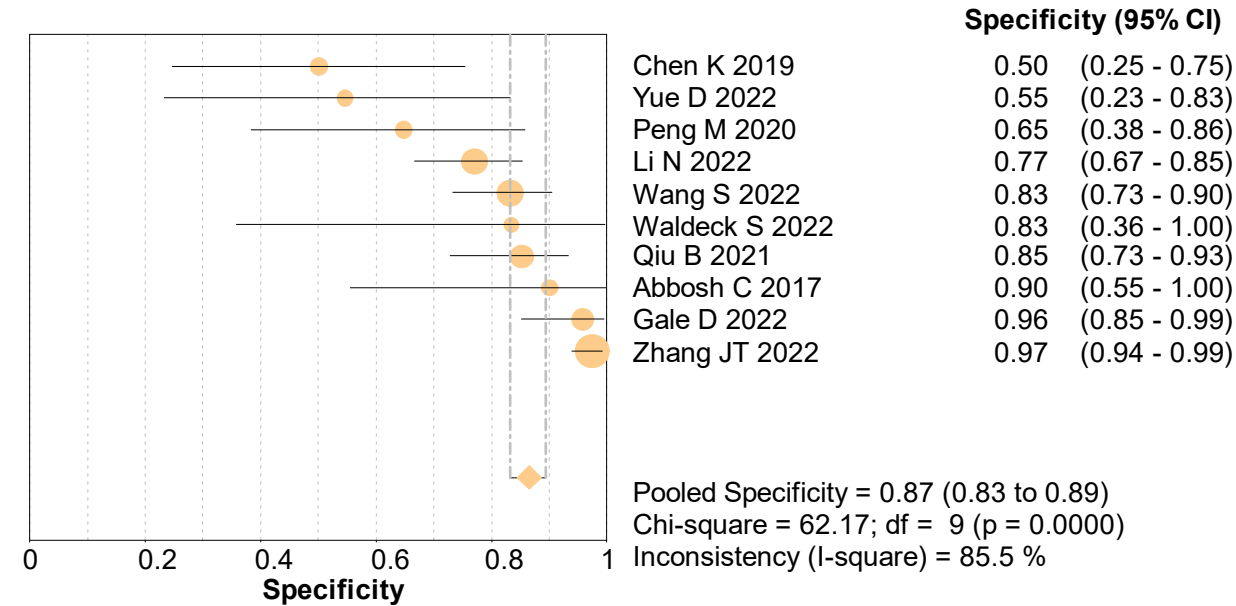

F

## Surveillance

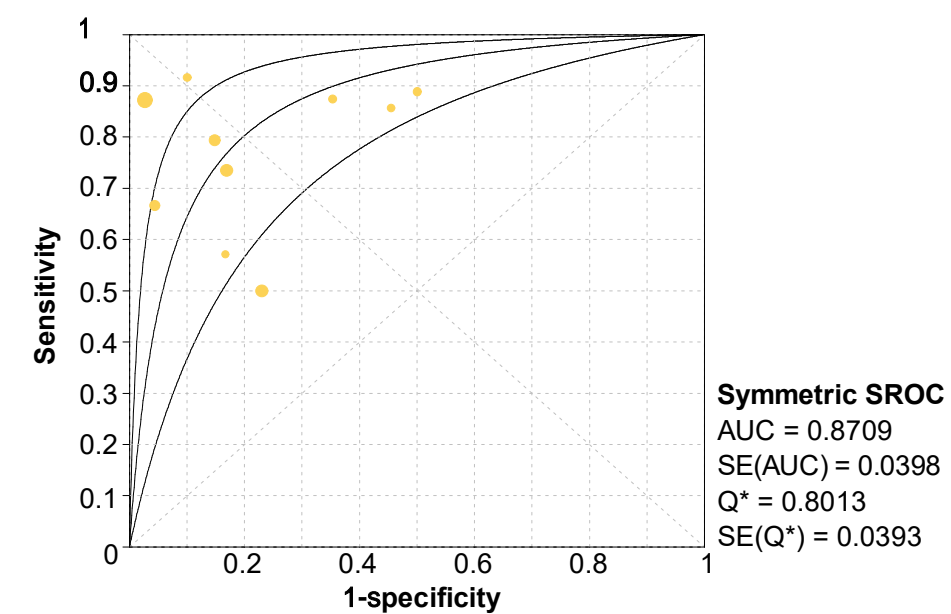

Supplement: 12916_2023_2849_MOESM8_ESM.pdf [file 12916_2023_2849_MOESM8_ESM.pdf]
