# Supplementary material for: Accuracy of minimal residual disease detection by circulating tumor DNA profiling in lung cancer: a meta-analysis
Source: Springer Nature journal article supplement (doi:10.1186/s12916-023-02849-z), 2023-05-12

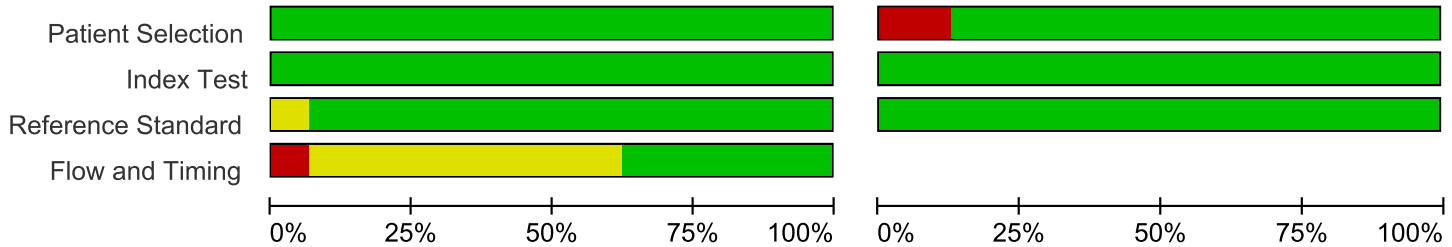

**Risk of Bias**

**Applicability Concerns**

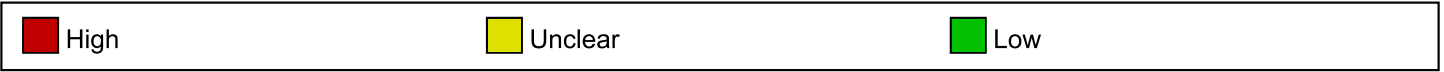

Supplement: MOESM3 [file 25352824]
