# Supplementary material for: Accuracy of minimal residual disease detection by circulating tumor DNA profiling in lung cancer: a meta-analysis
Source: Springer Nature journal article supplement (doi:10.1186/s12916-023-02849-z), 2023-05-12
Supplement: MOESM4 [file 25352824]

Risk of Bias

Applicability Concerns

|                   | Patient Selection | Index Test | Reference Standard | Flow and Timing | Patient Selection | Index Test | Reference Standard |
|-------------------|-------------------|------------|--------------------|-----------------|-------------------|------------|--------------------|
| Abbosh C 2017     | +                 | +          | +                  | ?               | +                 | +          | +                  |
| Chaudhuri AA 2017 | +                 | +          | +                  | +               | +                 | +          | +                  |
| Chen K 2019       | +                 | +          | +                  | ?               | +                 | +          | +                  |
| Gale D 2022       | +                 | +          | +                  | ?               | +                 | +          | +                  |
| Iams WT 2020      | +                 | +          | +                  | +               | -                 | +          | +                  |
| Li N 2022         | +                 | +          | +                  | ?               | +                 | +          | +                  |
| Moding EJ 2020    | +                 | +          | +                  | ?               | +                 | +          | +                  |
| Ohara S 2020      | +                 | +          | +                  | ?               | +                 | +          | +                  |
| Peng M 2020       | +                 | +          | +                  | +               | +                 | +          | +                  |
| Qiu B 2021        | +                 | +          | +                  | +               | +                 | +          | +                  |
| Waldeck S 2022    | +                 | +          | +                  | +               | +                 | +          | +                  |
| Wang S 2022       | +                 | +          | +                  | ?               | +                 | +          | +                  |
| Xia L 2021        | +                 | +          | +                  | ?               | -                 | +          | +                  |
| Yue D 2022        | +                 | +          | +                  | -               | +                 | +          | +                  |
| Zhang JT 2022     | +                 | +          | +                  | ?               | +                 | +          | +                  |
| Zviran A 2020     | +                 | +          | ?                  | +               | +                 | +          | +                  |

High

Unclear

Low
