# Supplementary material for: Accuracy of minimal residual disease detection by circulating tumor DNA profiling in lung cancer: a meta-analysis
Source: Springer Nature journal article supplement (doi:10.1186/s12916-023-02849-z), 2023-05-12
Supplement: MOESM7 [file 25352824]

A

## Landmark

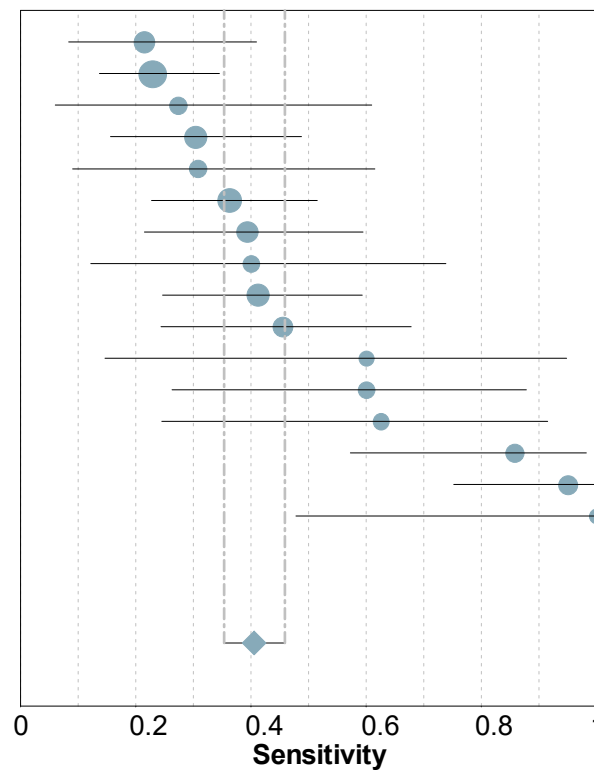

## Sensitivity (95% CI)

|                   |      |               |
|-------------------|------|---------------|
| Li N 2022         | 0.21 | (0.08 - 0.41) |
| Xia L 2021        | 0.23 | (0.14 - 0.34) |
| Iams WT 2020      | 0.27 | (0.06 - 0.61) |
| Wang S 2022       | 0.30 | (0.16 - 0.49) |
| Abbosh C 2017     | 0.31 | (0.09 - 0.61) |
| Zhang JT 2022     | 0.36 | (0.23 - 0.51) |
| Peng M 2020       | 0.39 | (0.22 - 0.59) |
| Waldeck S 2022    | 0.40 | (0.12 - 0.74) |
| Qiu B 2021        | 0.41 | (0.25 - 0.59) |
| Gale D 2022       | 0.45 | (0.24 - 0.68) |
| Ohara S 2020      | 0.60 | (0.15 - 0.95) |
| Chen K 2019       | 0.60 | (0.26 - 0.88) |
| Yue D 2022        | 0.63 | (0.24 - 0.91) |
| Moding EJ 2020    | 0.86 | (0.57 - 0.98) |
| Chaudhuri AA 2017 | 0.95 | (0.75 - 1.00) |
| Zviran A 2020     | 1.00 | (0.48 - 1.00) |

Pooled Sensitivity = 0.41 (0.35 to 0.46)  
 Chi-square = 70.44; df = 15 (p = 0.0000)  
 Inconsistency (I-square) = 78.7 %

B

## Landmark

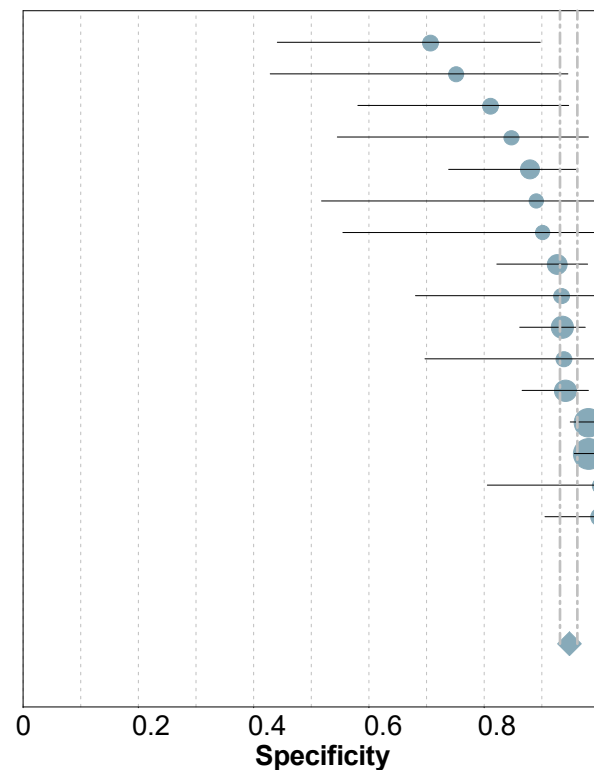

## Specificity (95% CI)

|                   |      |               |
|-------------------|------|---------------|
| Zviran A 2020     | 0.71 | (0.44 - 0.90) |
| Iams WT 2020      | 0.75 | (0.43 - 0.95) |
| Moding EJ 2020    | 0.81 | (0.58 - 0.95) |
| Yue D 2022        | 0.85 | (0.55 - 0.98) |
| Peng M 2020       | 0.88 | (0.74 - 0.96) |
| Waldeck S 2022    | 0.89 | (0.52 - 1.00) |
| Abbosh C 2017     | 0.90 | (0.55 - 1.00) |
| Qiu B 2021        | 0.93 | (0.82 - 0.98) |
| Ohara S 2020      | 0.93 | (0.68 - 1.00) |
| Li N 2022         | 0.93 | (0.86 - 0.98) |
| Chen K 2019       | 0.94 | (0.70 - 1.00) |
| Wang S 2022       | 0.94 | (0.86 - 0.98) |
| Zhang JT 2022     | 0.98 | (0.95 - 0.99) |
| Xia L 2021        | 0.98 | (0.96 - 0.99) |
| Chaudhuri AA 2017 | 1.00 | (0.80 - 1.00) |
| Gale D 2022       | 1.00 | (0.91 - 1.00) |

Pooled Specificity = 0.95 (0.93 to 0.96)  
 Chi-square = 45.50; df = 15 (p = 0.0001)  
 Inconsistency (I-square) = 67.0 %

C

## Landmark

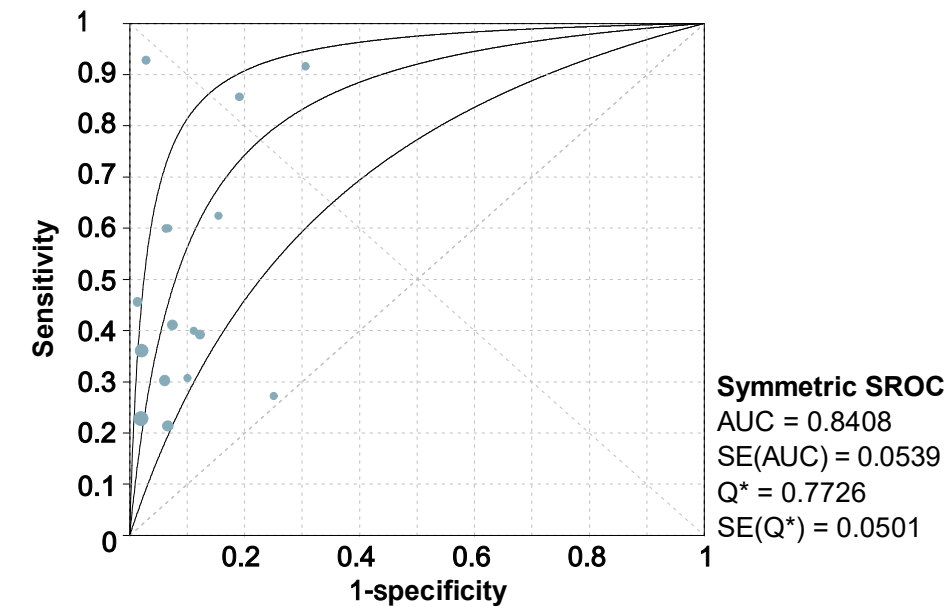

**Symmetric SROC**  
 AUC = 0.8408  
 SE(AUC) = 0.0539  
 Q\* = 0.7726  
 SE(Q\*) = 0.0501

D

## Surveillance

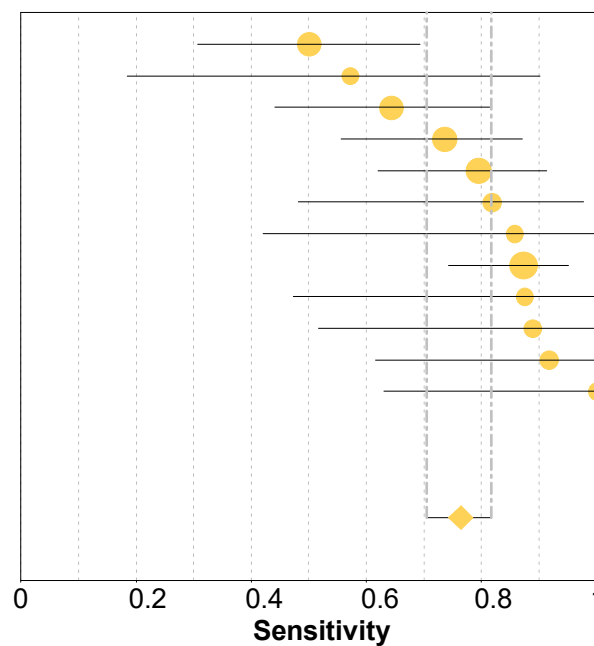

## Sensitivity (95% CI)

|                   |      |               |
|-------------------|------|---------------|
| Li N 2022         | 0.50 | (0.31 - 0.69) |
| Waldeck S 2022    | 0.57 | (0.18 - 0.90) |
| Gale D 2022       | 0.64 | (0.44 - 0.81) |
| Wang S 2022       | 0.74 | (0.56 - 0.87) |
| Qiu B 2021        | 0.79 | (0.62 - 0.91) |
| Iams WT 2020      | 0.82 | (0.48 - 0.98) |
| Yue D 2022        | 0.86 | (0.42 - 1.00) |
| Zhang JT 2022     | 0.87 | (0.74 - 0.95) |
| Peng M 2020       | 0.88 | (0.47 - 1.00) |
| Chen K 2019       | 0.89 | (0.52 - 1.00) |
| Abbosh C 2017     | 0.92 | (0.62 - 1.00) |
| Chaudhuri AA 2017 | 1.00 | (0.63 - 1.00) |

Pooled Sensitivity = 0.76 (0.70 to 0.82)  
 Chi-square = 24.65; df = 11 (p = 0.0103)  
 Inconsistency (I-square) = 55.4 %

E

## Surveillance

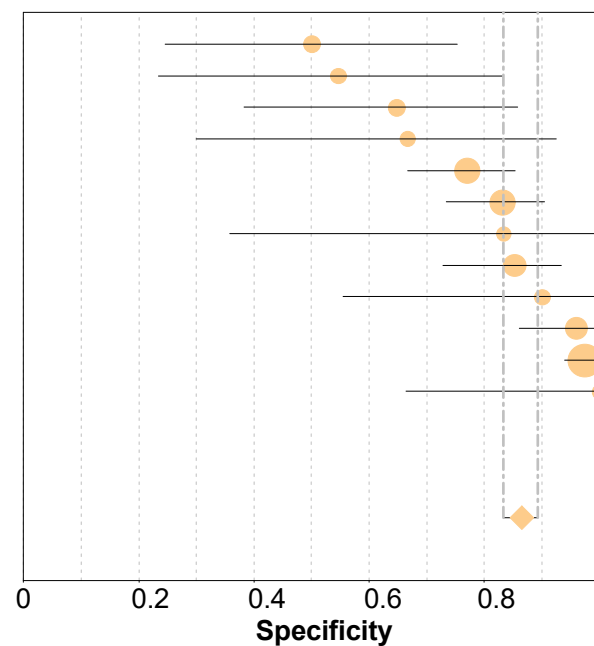

## Specificity (95% CI)

|                   |      |               |
|-------------------|------|---------------|
| Chen K 2019       | 0.50 | (0.25 - 0.75) |
| Yue D 2022        | 0.55 | (0.23 - 0.83) |
| Peng M 2020       | 0.65 | (0.38 - 0.86) |
| Iams WT 2020      | 0.67 | (0.30 - 0.93) |
| Li N 2022         | 0.77 | (0.67 - 0.85) |
| Wang S 2022       | 0.83 | (0.73 - 0.90) |
| Waldeck S 2022    | 0.83 | (0.36 - 1.00) |
| Qiu B 2021        | 0.85 | (0.73 - 0.93) |
| Abbosh C 2017     | 0.90 | (0.55 - 1.00) |
| Gale D 2022       | 0.96 | (0.86 - 1.00) |
| Zhang JT 2022     | 0.97 | (0.94 - 0.99) |
| Chaudhuri AA 2017 | 1.00 | (0.66 - 1.00) |

Pooled Specificity = 0.86 (0.83 to 0.89)  
 Chi-square = 67.69; df = 11 (p = 0.0000)  
 Inconsistency (I-square) = 83.8 %

F

## Surveillance

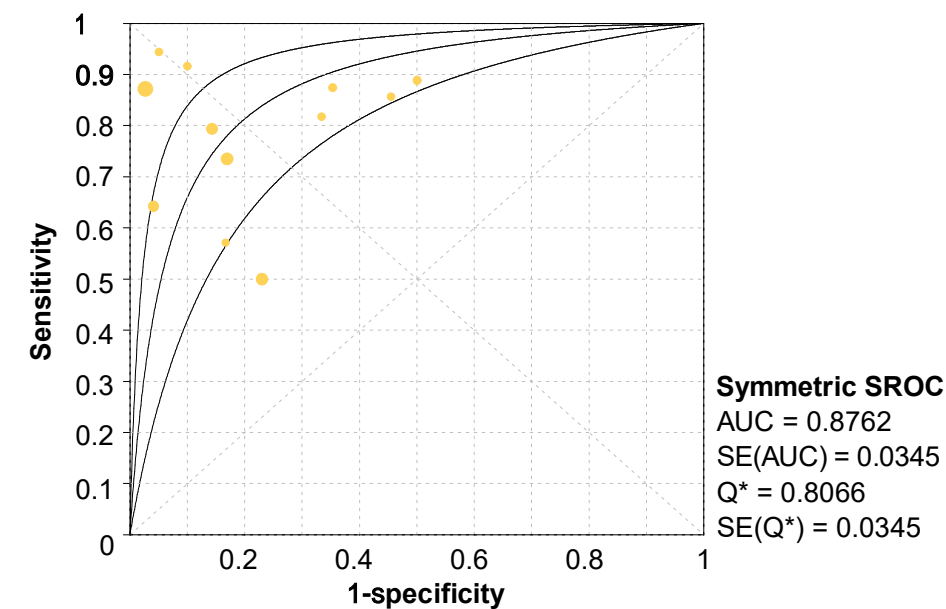

**Symmetric SROC**  
 AUC = 0.8762  
 SE(AUC) = 0.0345  
 Q\* = 0.8066  
 SE(Q\*) = 0.0345
